# Supplementary material for: pH and Redox-Dual Sensitive Chitosan Nanoparticles Having Methyl Ester and Disulfide Linkages for Drug Targeting against Cholangiocarcinoma Cells
Source: MDPI journal article supplement (doi:10.3390/ma15113795), 2022-05-26
Supplement: s1 [file s1]

## **Supporting Materials**

### **Experimental**

#### Analysis of Particle size distribution

Zetasizer Nano-ZS<sup>®</sup> (Malvern, Worcestershire, UK) was employed to measure particle size distribution. The nanoparticle concentration in the distilled water was adjusted to 0.1 % (w/w) and measured at 20 °C.

### **Results**

As shown in Figure S1, TEM photo indicated that ChitoHISss nanoparticles have spherical shapes and their particle sizes were less than 200 nm. Average particle size of ChitoHISss nanoparticles was  $134.5 \pm 18.4$  nm. Their average particle sizes were almost similar to the results of the particle size analysis results as shown in Figure 2 and Table 1.

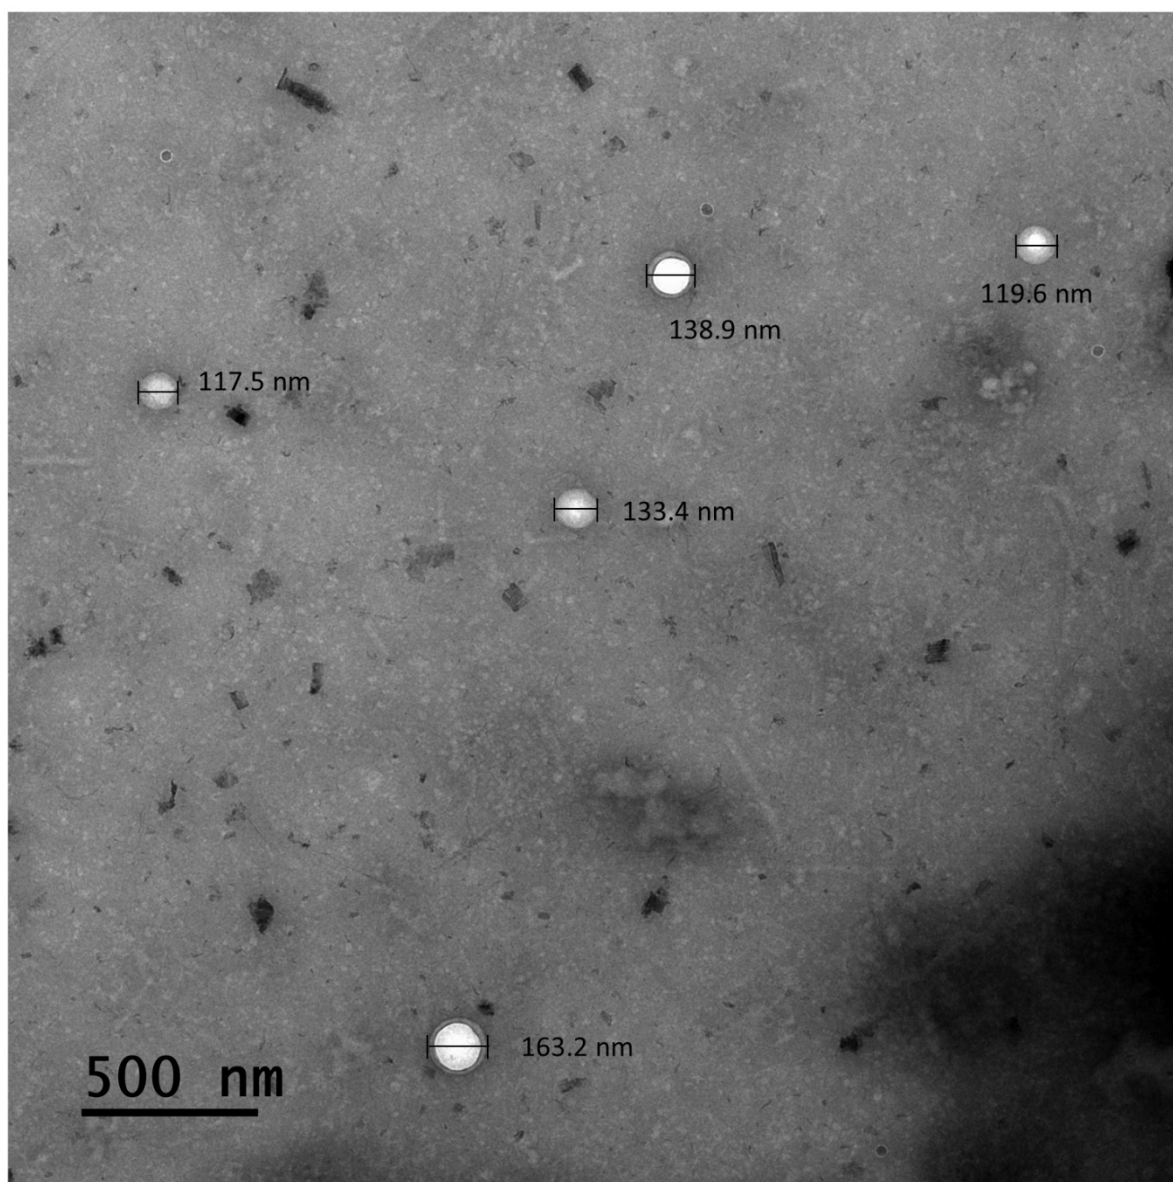

**Figure S1.** Morphological observation of ChitoHISss nanoparticles and their particle size. Particle size indicated in the photo was estimated by photo of TEM equipment.
